# Supplementary material for: unc-37/Groucho and lsy-22/AES repress Wnt target genes in C. elegans asymmetric cell divisions
Source: bioRxiv or medRxiv preprint supplement (doi:10.1101/2022.01.10.475695), 2022-02-08
Supplement: Supplementary file [file media-1.pdf]

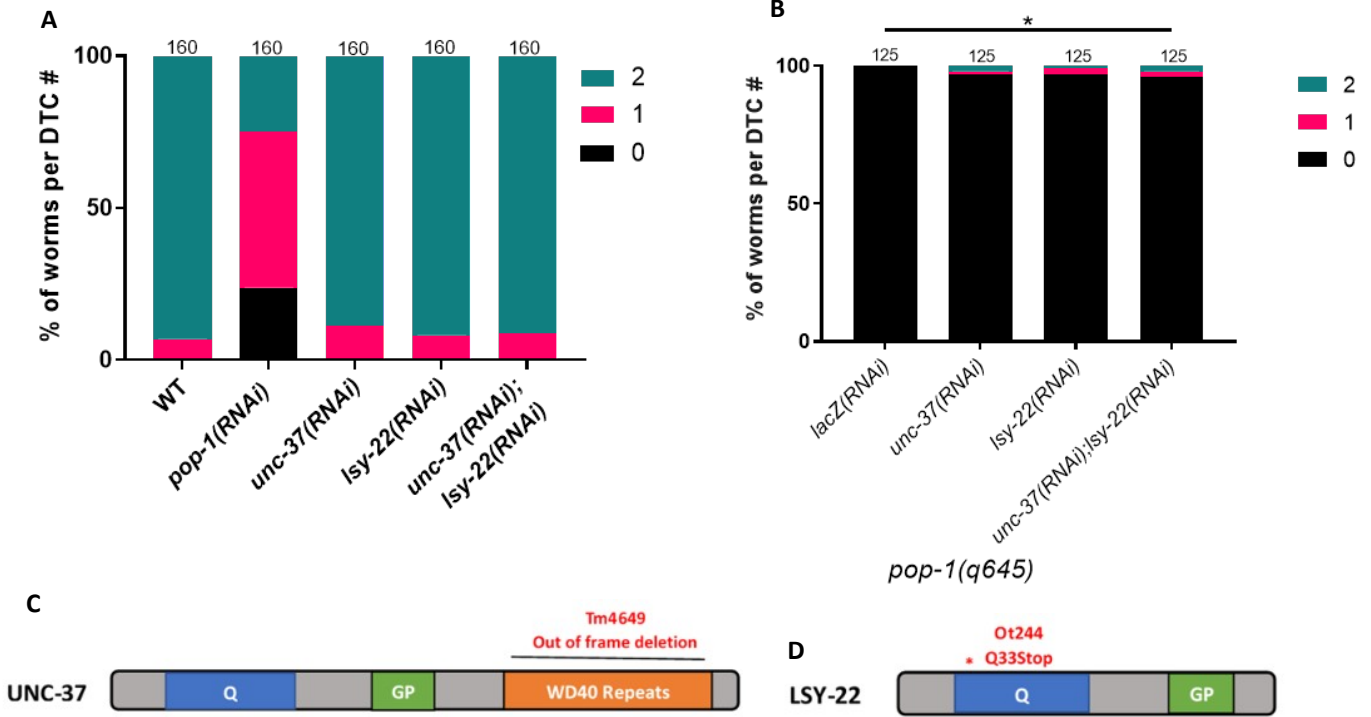

**Supplemental Figure 1: Evaluating Groucho knockdown and graphics of null alleles.** A) Corepressor knockdown does not change DTC fate. B) Double Groucho knockdown partially suppressed DTC loss from defective POP-1 activation allele. C) Graphic of *unc-37* null allele *tm4649* D) Graphic of *lsy-22* null allele *ot244*. N value listed above each bar. \*- $p < 0.05$ , \*\*- $p < 0.01$ , \*\*\*- $p < 0.001$ , \*\*\*\*- $p \leq 0.0001$  via unpaired t-Test.

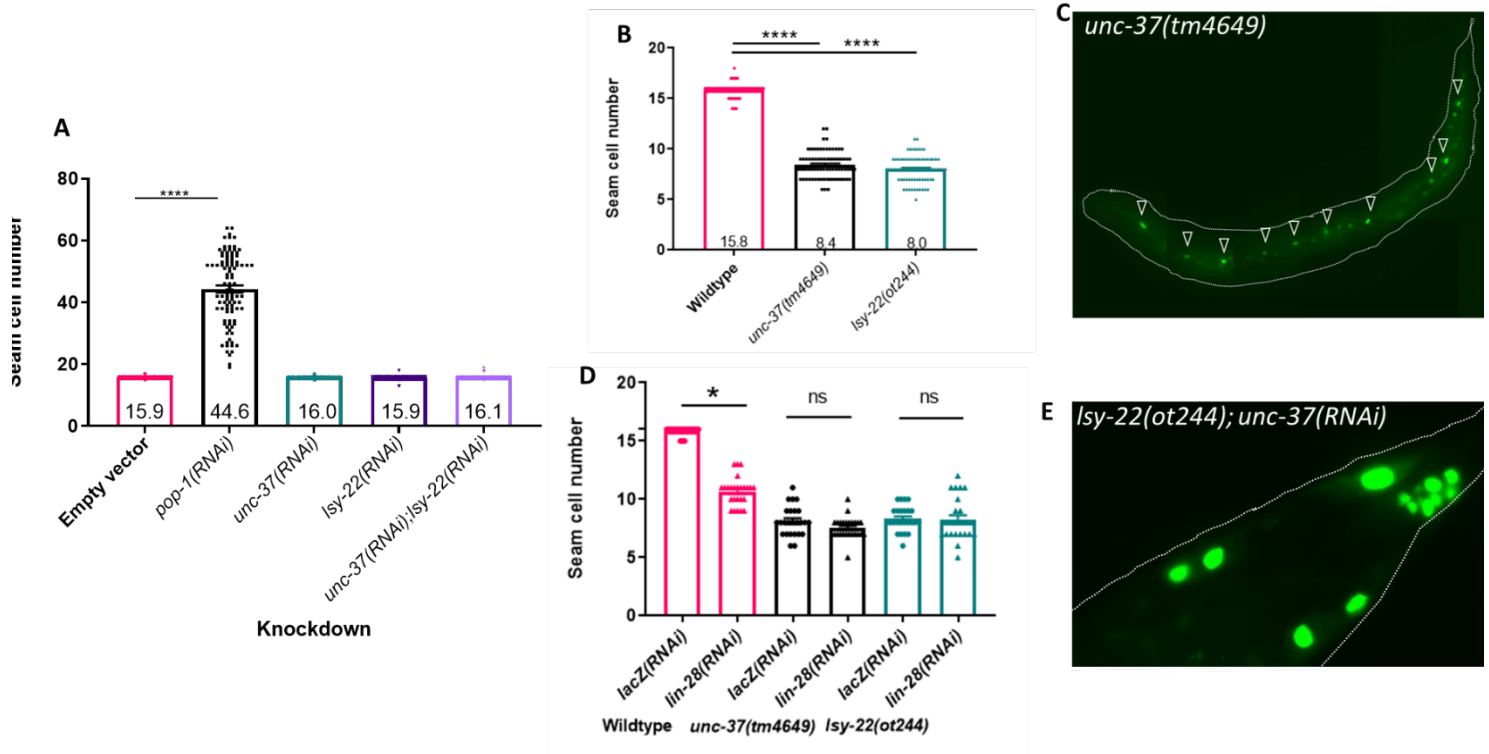

**Supplemental Figure 2: Groucho nulls, but not knockdown, skip the symmetric division and misspecify tail SC lineage.**

A) Corepressor knockdown does not affect SC fate (mean value listed inside the bar; n=100 all conditions). B) SC fate decreases in *unc-37* and *Isy-22* nulls (mean value listed inside the bar; n=75 all conditions). C) Representative image of decreased SCs in the *unc-37* null. Arrow heads denote SCs. D) Loss of symmetric division does not affect SC fate in Groucho nulls (n=25, all conditions). E) Representative image of tail cells misexpressing  $P_{scm}::GFP$  in the *Isy-22* null with *unc-37(RNAi)*. \*-p $\leq$ 0.05, \*\*-p $\leq$ 0.01, \*\*\*-p $\leq$ 0.001, \*\*\*\*-p $\leq$ 0.0001 via unpaired t-Test.

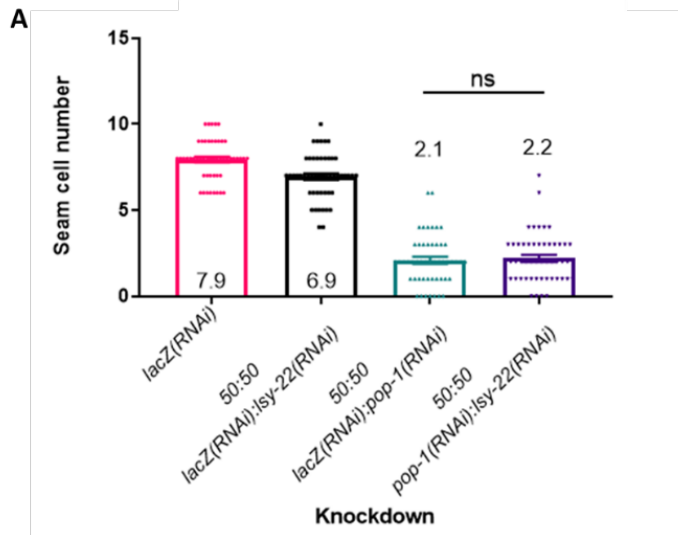

**Supplemental Figure 3: Decreased SC number in *unc-37* null with *pop-1* knockdown is not a function of excess LSY-22.**

A) *lsy-22* knockdown does not rescue decreased SC phenotype in *unc-37* null with *pop-1* knockdown (N=55, for all conditions)

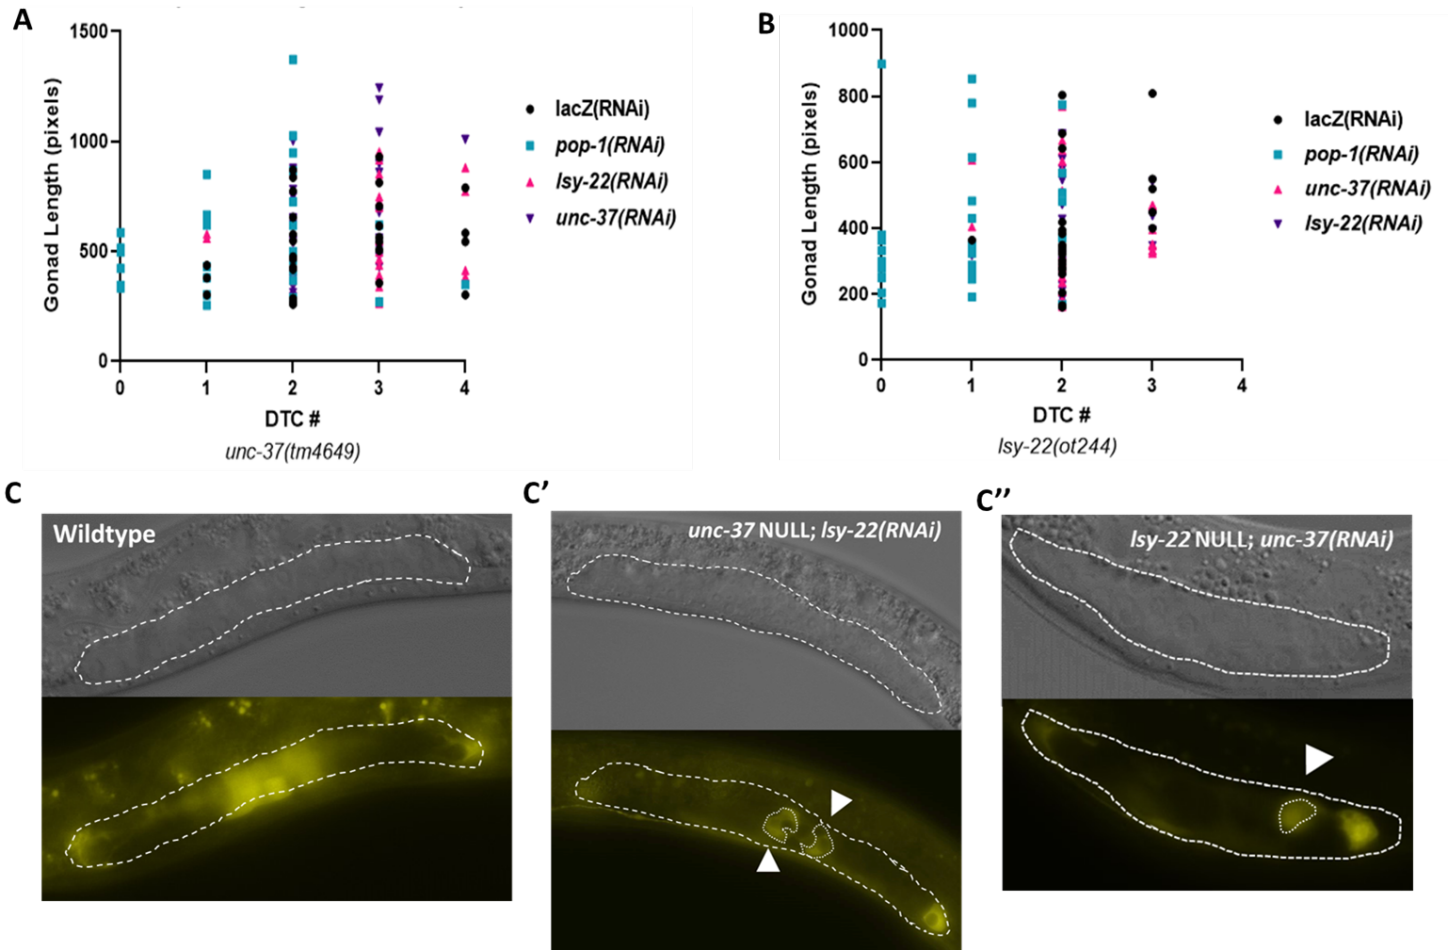

**Supplemental Figure 4: Wnt target gene expression is independent of gonadal development.** A) *qIs90*[*P<sub>ceh-22</sub>::YFP*] misexpression in *unc-37* null and RNAi conditions does not cluster around one gonadal developmental timepoint (n=30, all conditions). B) *qIs90*[*P<sub>ceh-22</sub>::YFP*] misexpression in *lsy-22* null and RNAi conditions do not cluster around one gonadal developmental timepoint (n=30, all conditions). C) Representative images of wildtype *qIs90*[*P<sub>ceh-22</sub>::YFP*] expression and misexpression in C') *unc-37* null with *lsy-22(RNAi)* or C'') *lsy-22* null with *unc-37(RNAi)*. Here, the gonad is outlined with white dashed lines and cells ectopically expressing *qIs90*[*P<sub>ceh-22</sub>::YFP*] are outlined with a white dotted line and denoted by white arrowheads.

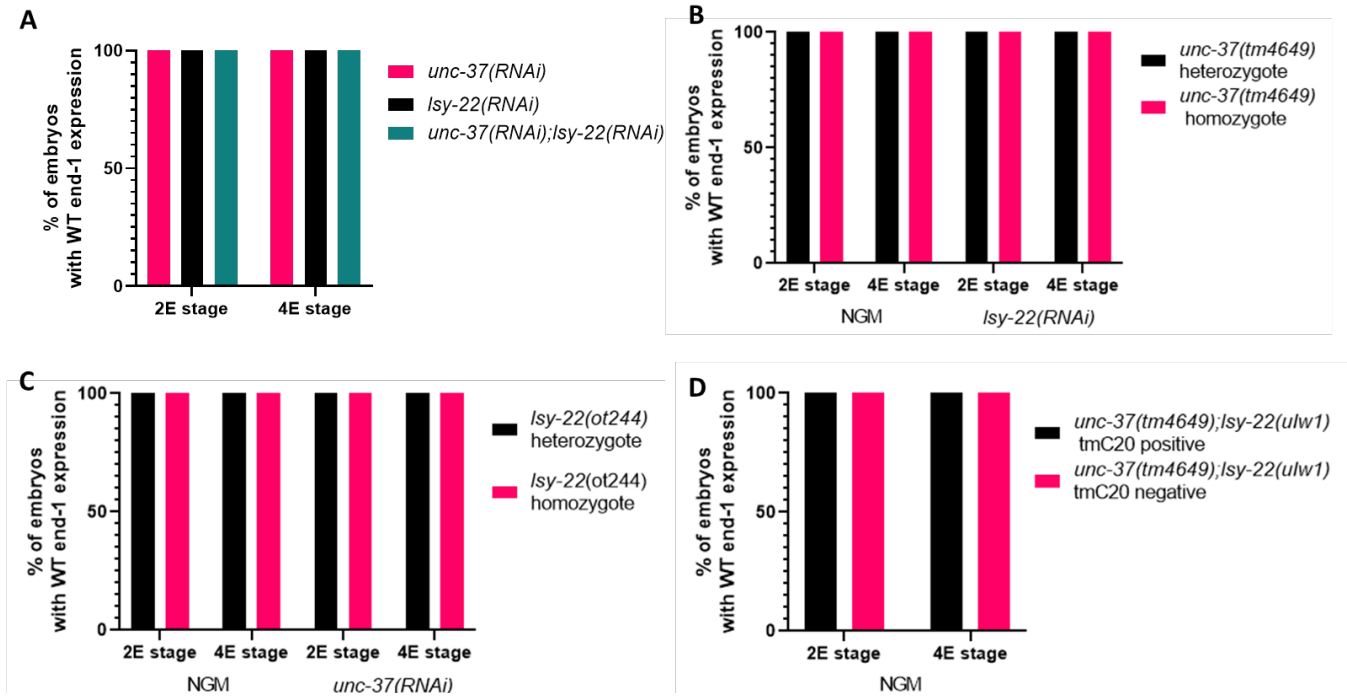

**Supplemental Figure 5: Corepressors function in embryonic endoderm specification Groucho proteins are maternally inherited in the early embryo** A) Groucho knockdown does not affect endoderm fate from *tel46*[ $P_{end-1}$ ::GFP::H2B]( $n=20$ , all conditions). B) *unc-37* null does not affect endoderm development with *tel46*[ $P_{end-1}$ ::GFP::H2B](heterozygotes NGM,  $n=12$ ; homozygotes NGM  $n=5$ ; heterozygotes *lsy-22(RNAi)*  $n=10$ ; homozygotes *lsy-22(RNAi)*  $n=5$ ). C) *lsy-22* null does not affect endoderm development with *tel46*[ $P_{end-1}$ ::GFP::H2B](heterozygotes NGM,  $n=14$ ; homozygotes NGM  $n=5$ ; heterozygotes *lsy-22(RNAi)*  $n=10$ ; homozygotes *lsy-22(RNAi)*  $n=5$ ). D) Double *unc-37*, *lsy-22* null does not affect endoderm development with *tel46*[ $P_{end-1}$ ::GFP::H2B](tmC20 positive  $n=10$ ; tmC20 negative  $n=5$ ).
